# Supplementary material for: Ajuforrestin A, an Abietane Diterpenoid from Ajuga ovalifolia var. calanthe, Induces A549 Cell Apoptosis by Targeting SHP2
Source: MDPI journal article supplement (doi:10.3390/molecules27175469), 2022-08-25
Supplement: s1 [file s1]

## List of supporting information

**Figure S1.**  $^1\text{H}$  NMR (400 MHz,  $\text{CDCl}_3$ ) spectrum of **1**

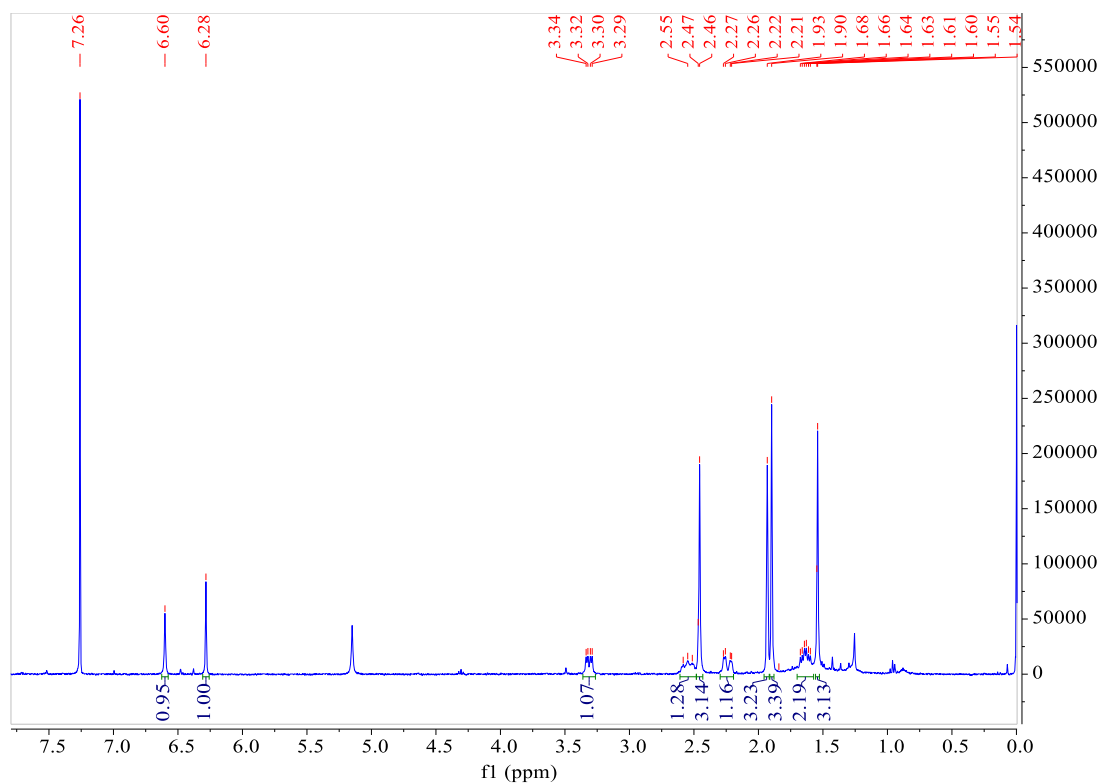

**Figure S2.**  $^{13}\text{C}$  NMR (100 MHz,  $\text{CDCl}_3$ ) spectrum of **1**

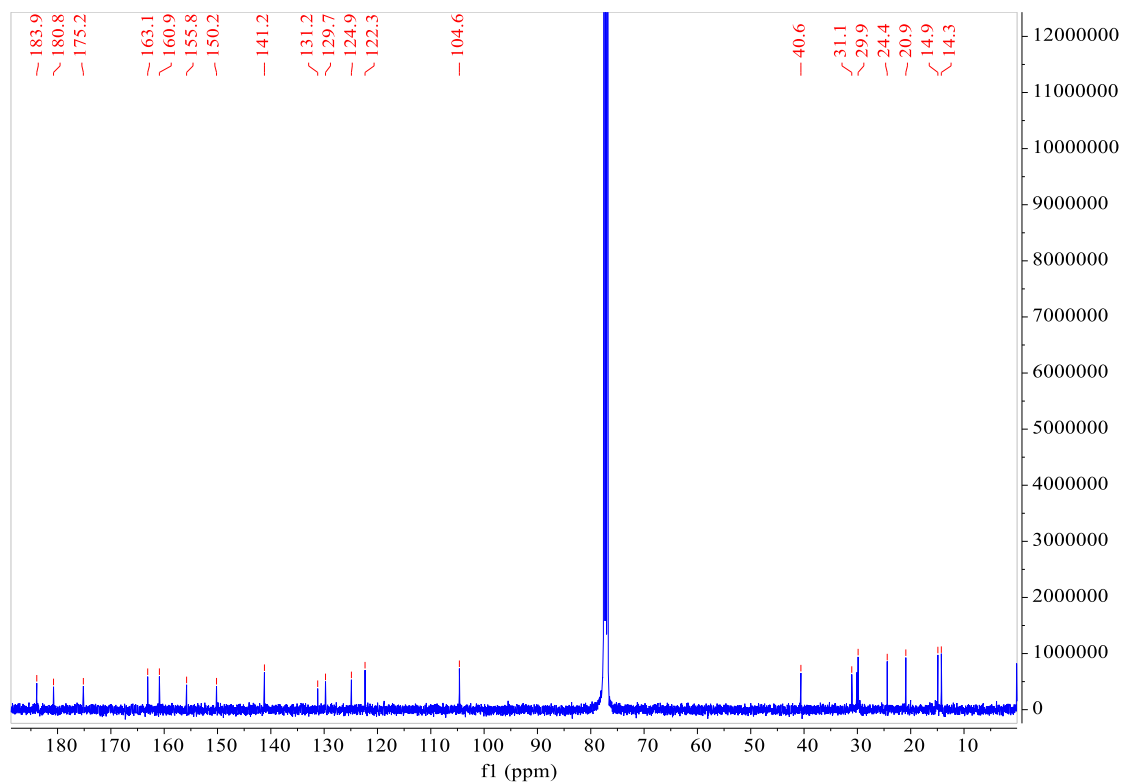

**Figure S3.** HRESI (+) MS spectrum of **2**

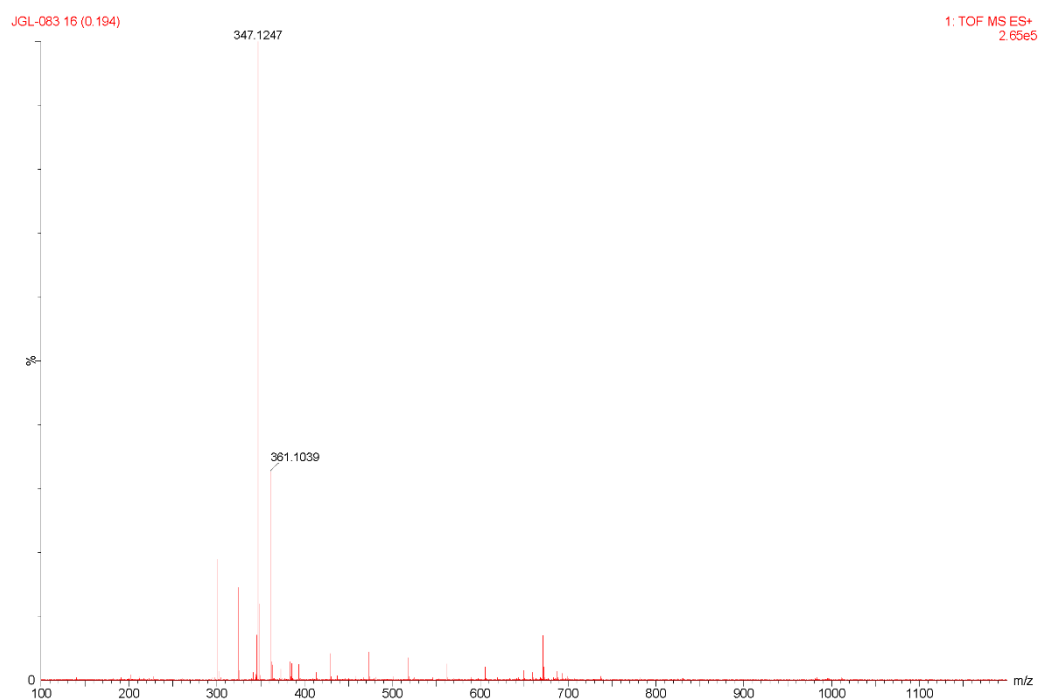

**Figure S4.**  $^1\text{H}$  NMR (400 MHz, Acetone- $d_6$ ) spectrum of **2**

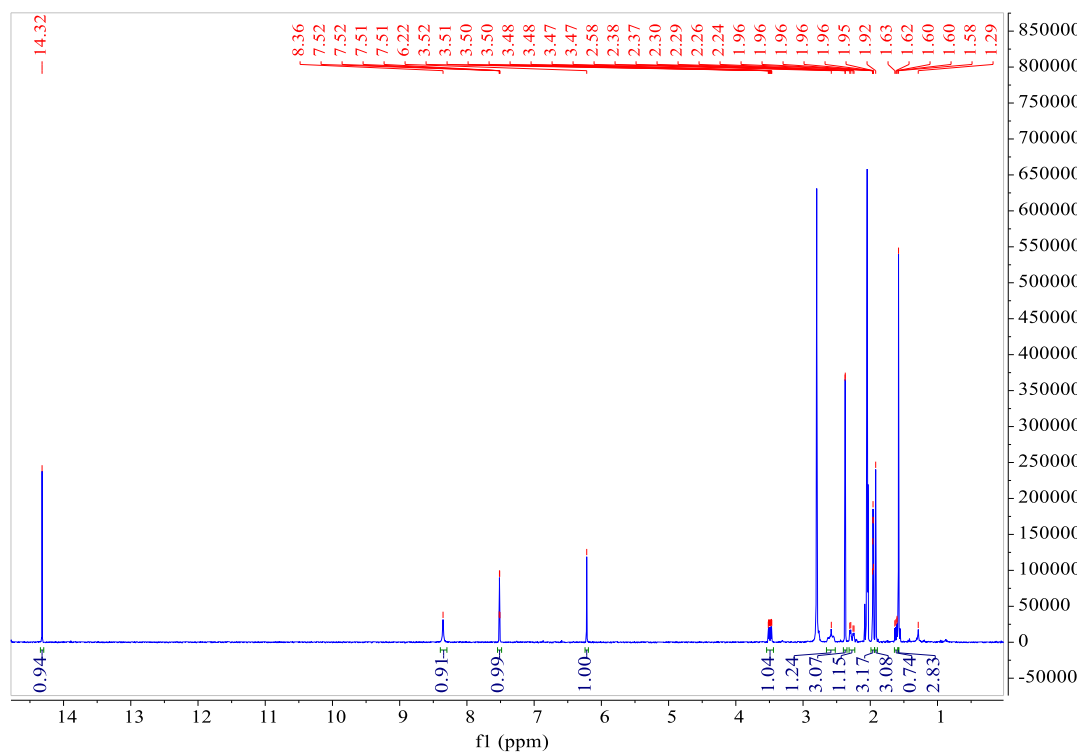

**Figure S5.**  $^{13}\text{C}$  NMR (100 MHz, Acetone- $d_6$ ) spectrum of **2**

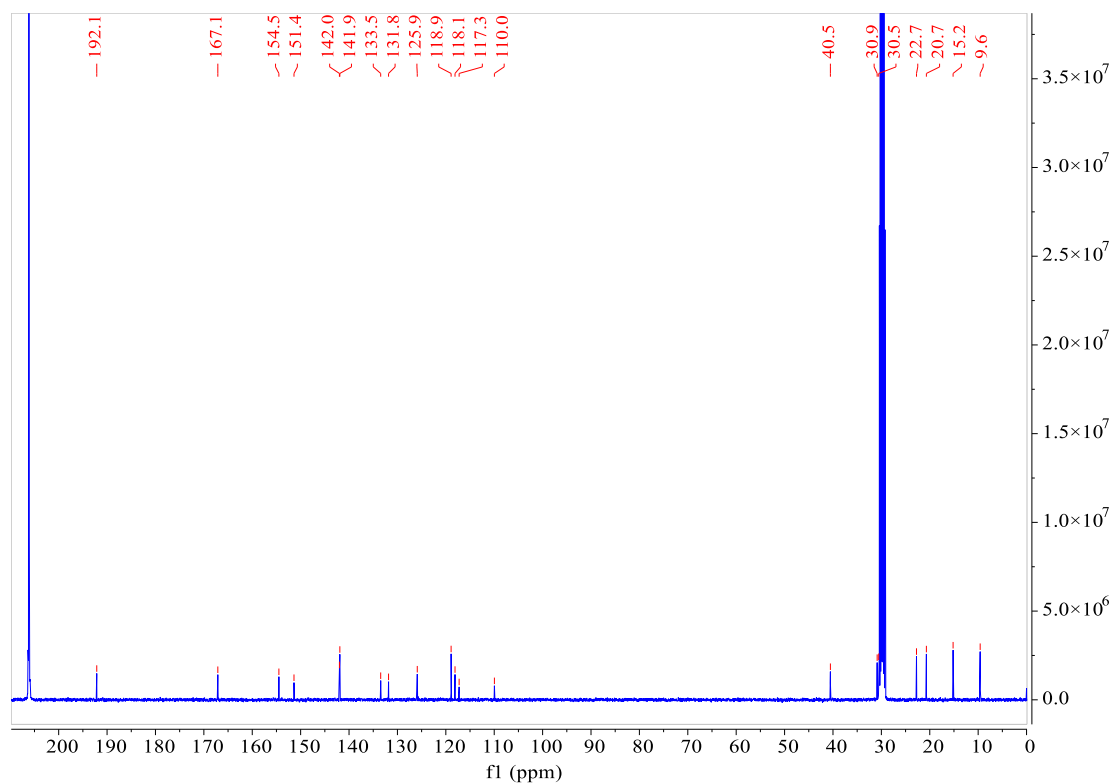

**Figure S6.** HRESI (+) MS spectrum of **3**

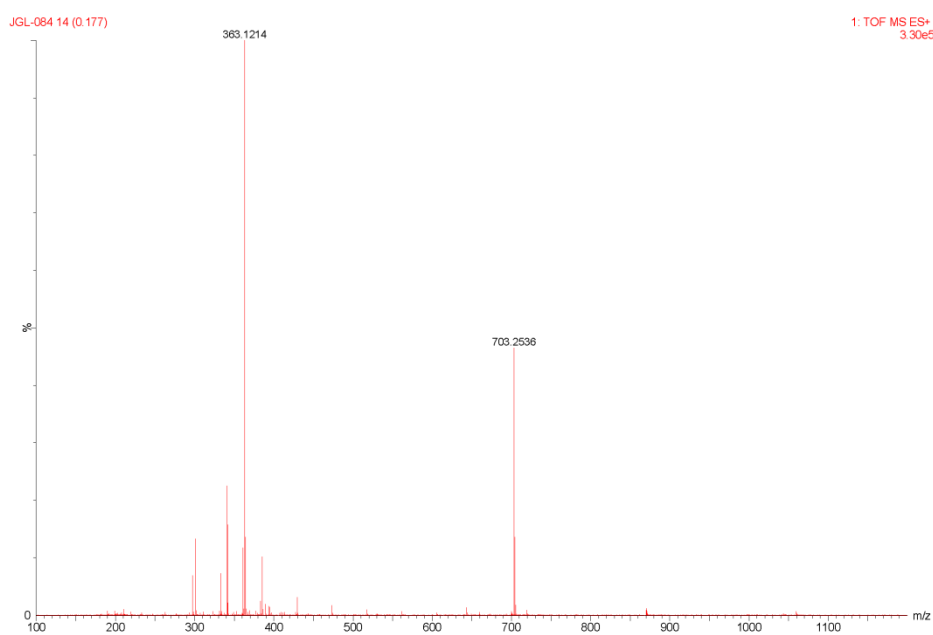

**Figure S7.**  $^1\text{H}$  NMR (400 MHz,  $\text{CDCl}_3$ ) spectrum of **3**

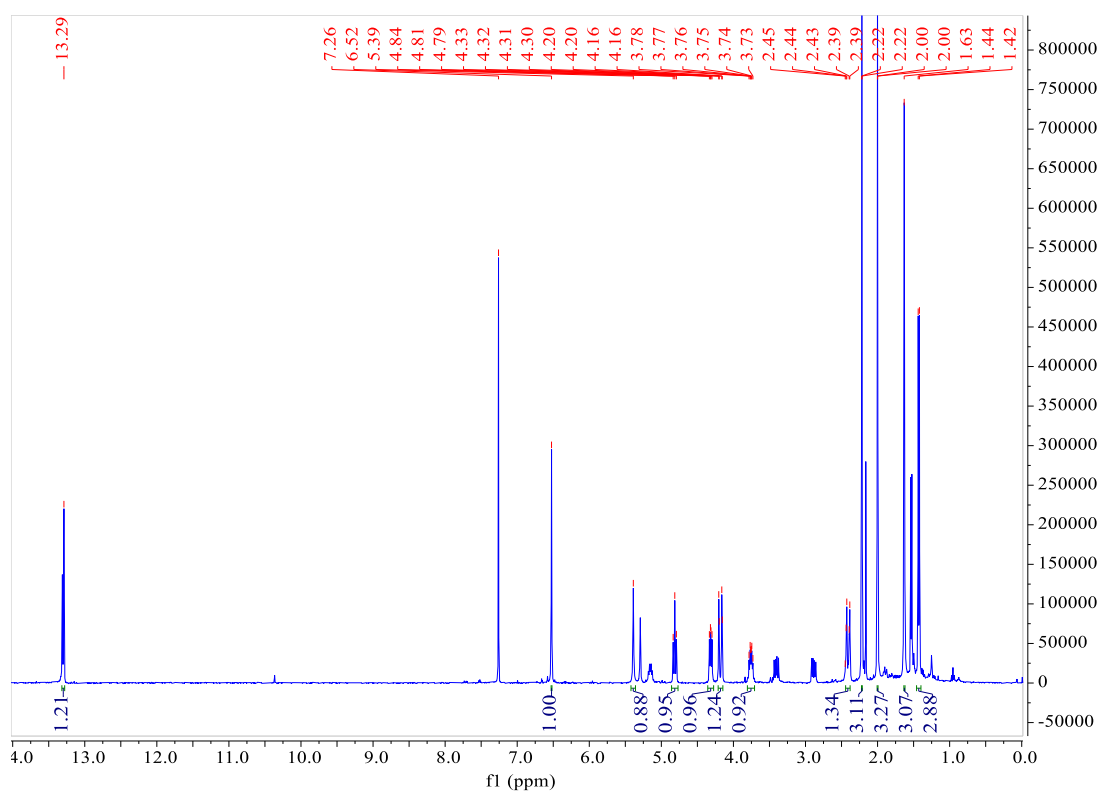

**Figure S8.**  $^{13}\text{C}$  NMR (100 MHz,  $\text{CDCl}_3$ ) spectrum of **3**

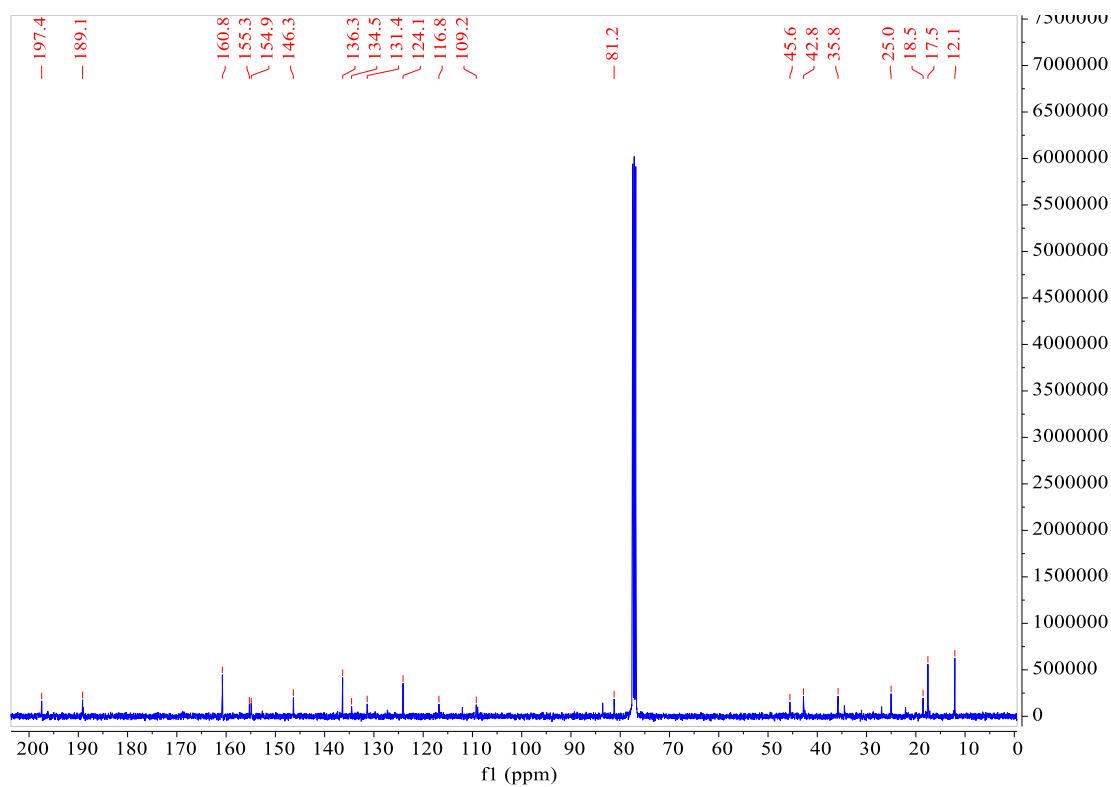

**Figure S9.** (A, B) The effects of compound **2** on cellular SHP2/p-SHP2 expression.

(C) Cellular thermal shift assay between SHP2 and different dose compound 2.

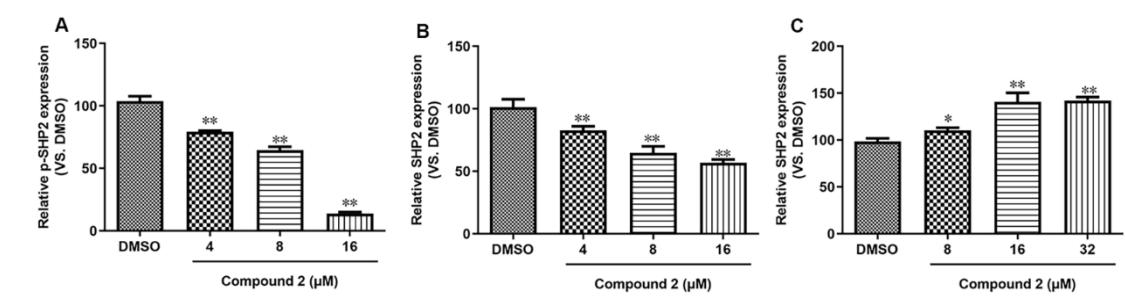

**Figure S10.** Molecular docking of SHP099 with SHP2 (PDB ID: 5EHR, green dash, hydrogen bonds; yellow dash,  $\pi$ -cation interaction; purple dash, halogen bond; other residues, hydrophobic interactions)

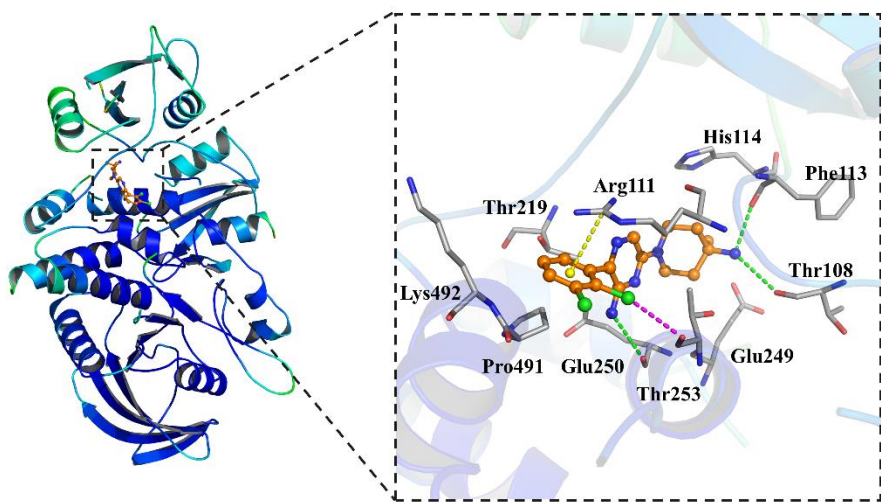

**Figure S11.** Docking pose and affinity energy of compound 2 binding to SHP2 (PDB ID: 5EHR)

| mode | affinity   | dist from best mode |           |
|------|------------|---------------------|-----------|
|      | (kcal/mol) | rmsd l.b.           | rmsd u.b. |
| 1    | -7.8       | 0.000               | 0.000     |
| 2    | -7.6       | 2.492               | 6.095     |
| 3    | -6.6       | 1.751               | 2.890     |
| 4    | -6.5       | 3.859               | 6.203     |
| 5    | -6.2       | 1.944               | 6.519     |
| 6    | -5.9       | 4.057               | 6.126     |
| 7    | -5.8       | 3.828               | 7.268     |
| 8    | -5.8       | 1.571               | 3.171     |
| 9    | -5.5       | 3.908               | 7.477     |

**Figure S12.** Docking pose and affinity energy of SHP099 binding to SHP2 (PDB ID: 5EHR)

| mode | affinity   | dist from best mode |           |
|------|------------|---------------------|-----------|
|      | (kcal/mol) | rmsd l.b.           | rmsd u.b. |
| 1    | -10.9      | 0.000               | 0.000     |
| 2    | -10.2      | 1.381               | 1.794     |
| 3    | -9.1       | 2.121               | 3.059     |
| 4    | -8.5       | 1.423               | 2.327     |
| 5    | -8.2       | 4.516               | 8.918     |
| 6    | -8.0       | 4.272               | 8.692     |

**Figure S13.** Docking analysis of compound **2** binding to SHP2 (PDB ID: 5EHR) by PIPL

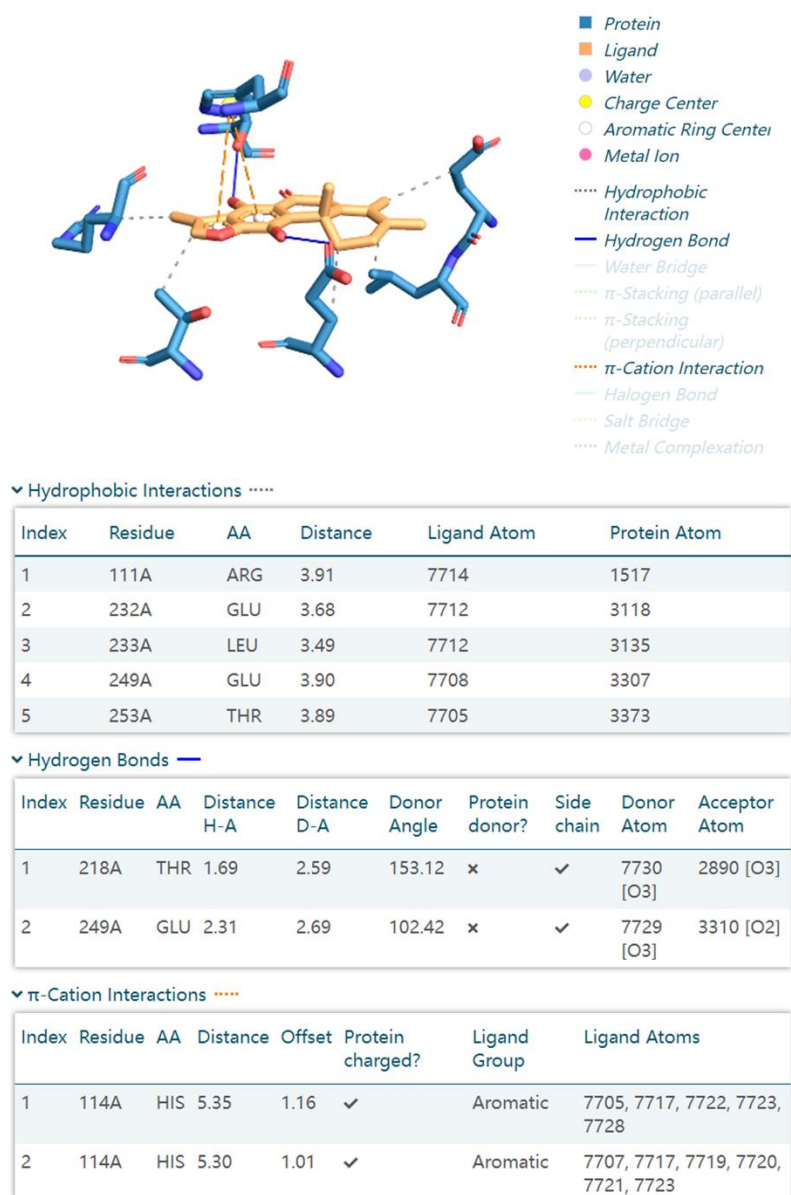

**Figure S14.** Docking analysis of compound **2** binding to SHP2 (PDB ID: 5EHR) by LigPlus

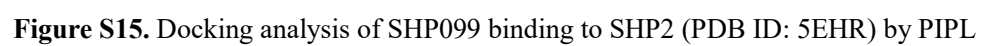

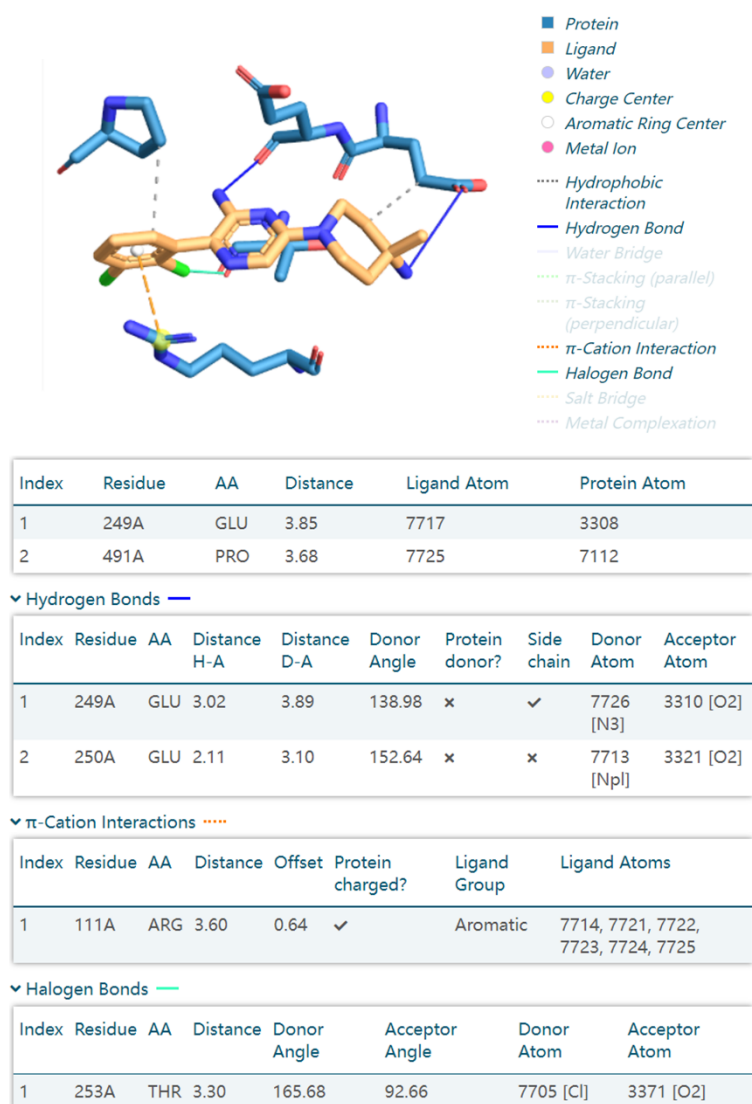

**Figure S16.** Docking analysis of SHP099 binding to SHP2 (PDB ID: 5EHR) by LigPlus

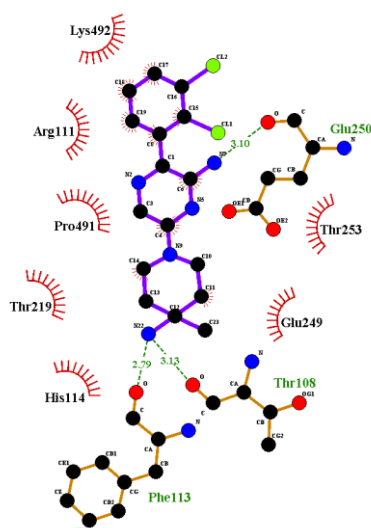



**Figure S17.** The relative expression of p-ERK, p-AKT and p-STAT3 after 72 h compound 2 treatment.

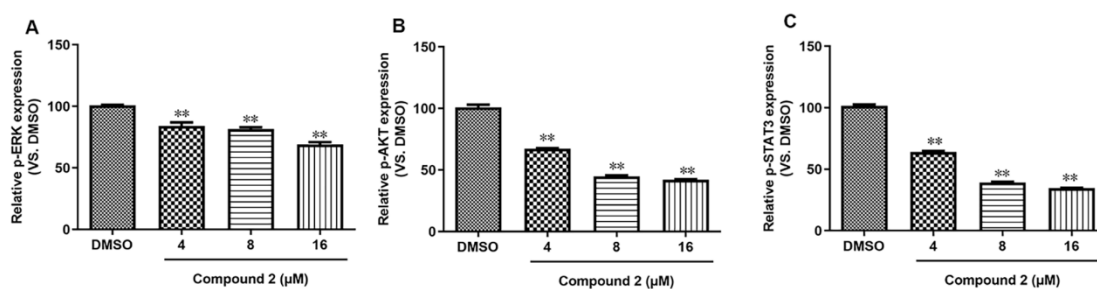

**Figure S18.** The relative expression of cleaved caspase 8,9,3 and cleaved PARP after 72 h compound 2 treatment.

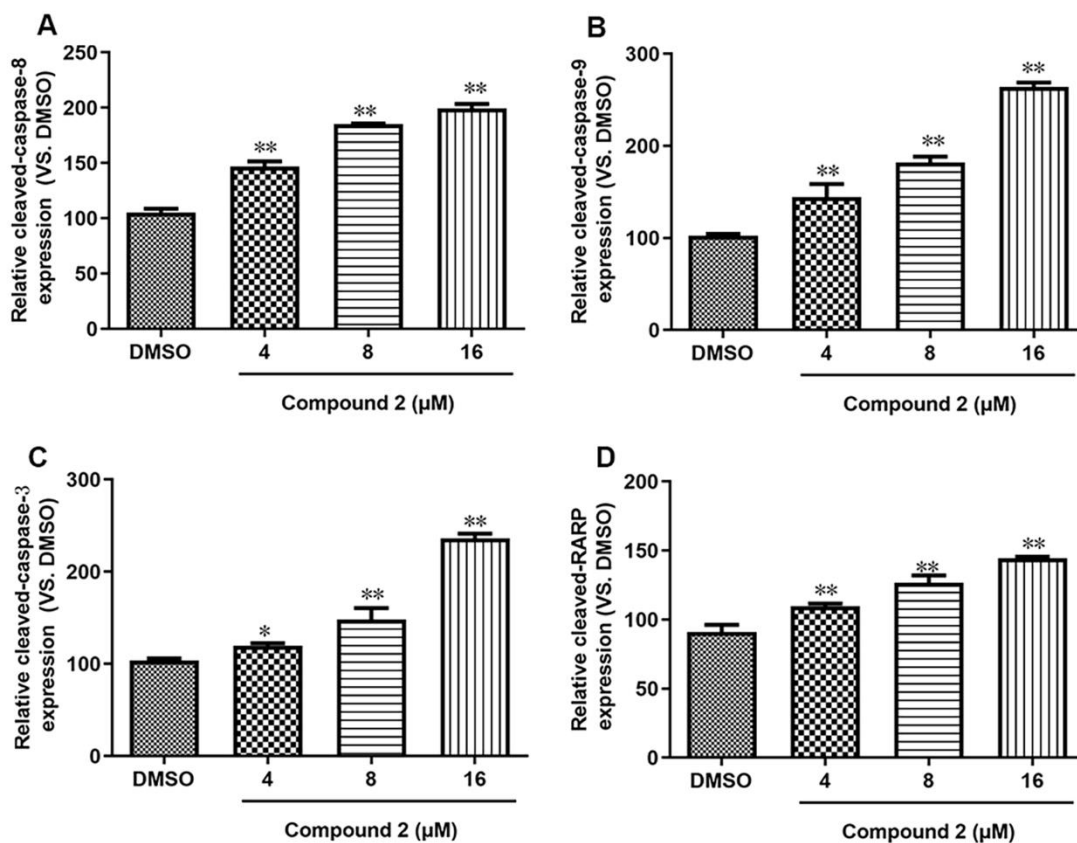

**Table S1.** List of bonding interactions of SHP099 and compound 2 binding to SHP2 (PDB ID: 5EHR)

| Compounds | Residues | Distance (Å) | Bond type      |
|-----------|----------|--------------|----------------|
| SHP099    | Glu250   | 3.10         | Hydrogen bonds |

|                   |        |      |                            |
|-------------------|--------|------|----------------------------|
| Compound <b>2</b> | Thr108 | 3.13 | Hydrogen bonds             |
|                   | Phe113 | 2.79 | Hydrogen bonds             |
|                   | Thr253 | 3.30 | Halogen bonds              |
|                   | Arg111 | 3.60 | $\pi$ -cation interactions |
|                   | Lys492 | < 4  | Hydrophobic interactions   |
|                   | Arg111 | < 4  | Hydrophobic interactions   |
|                   | Pro491 | < 4  | Hydrophobic interactions   |
|                   | Thr219 | < 4  | Hydrophobic interactions   |
|                   | His114 | < 4  | Hydrophobic interactions   |
|                   | Thr253 | < 4  | Hydrophobic interactions   |
|                   | Glu249 | < 4  | Hydrophobic interactions   |
|                   | THR218 | 2.59 | Hydrogen bonds             |
|                   | THR218 | 3.15 | Hydrogen bonds             |
|                   | GLU249 | 2.69 | Hydrogen bonds             |
|                   | His114 | 5.30 | $\pi$ -cation interactions |
|                   | His114 | 5.35 | $\pi$ -cation interactions |
|                   | Clu110 | < 4  | Hydrophobic interactions   |
|                   | Arg111 | < 4  | Hydrophobic interactions   |
|                   | Glu249 | < 4  | Hydrophobic interactions   |
|                   | Gly246 | < 4  | Hydrophobic interactions   |
|                   | Leu233 | < 4  | Hydrophobic interactions   |
|                   | Glu250 | < 4  | Hydrophobic interactions   |
|                   | Glu232 | < 4  | Hydrophobic interactions   |
|                   | Thr219 | < 4  | Hydrophobic interactions   |
|                   | Thr253 | < 4  | Hydrophobic interactions   |

**Table S2.** List of pharmacokinetics properties of compound **2**, including pharmacokinetic properties, lipophilicity, water solubility, drug-likeness, and medicinal chemistry.

| Properties       |                                   | Compound <b>2</b>    |
|------------------|-----------------------------------|----------------------|
| Physicochemical  | MW (g/mol)                        | 324.37 g/mol         |
| Properties       | Heavy atoms                       | 24                   |
|                  | Arom. Heavy atmos                 | 9                    |
|                  | Rotatable bonds                   | 0                    |
|                  | H-bond acceptors                  | 4                    |
|                  | H-bond donors                     | 2                    |
|                  | TPSA ( $\leq 140 \text{ \AA}^2$ ) | 70.67 $\text{\AA}^2$ |
| Lipophilicity    | Consensus Log $P_{o/w}$           | 3.74                 |
| Water solubility | Log S (ESOL)                      | Moderate             |
| Pharmacokinetics | GI absorption                     | High                 |
|                  | BBB permeant                      | Yes                  |
| Drug-likeness    | Lipinski                          | Yes                  |
|                  | Bioavailability score             | 0.55                 |
| Medi. Chemistry  | PAINS                             | 1 alert              |
